# Supplementary material for: Redox-mediated transformation of a Tb2O3(111) thin film from the cubic fluorite to bixbyite structure
Source: Royal Society of Chemistry journal article supplement (doi:10.1039/c9cp05083c), 2019-12-02
Supplement: c9cp05083c1.pdf [file c9cp05083c1.pdf]

## Supporting Information

### Redox-Mediated Transformation of a $\text{Tb}_2\text{O}_3(111)$ Thin Film from the Cubic Fluorite to Bixbyite Structure

Christopher J. Lee<sup>1</sup>, Ameen Sayal<sup>1</sup>, Saumye Vashishtha<sup>1</sup>, Jason F. Weaver<sup>1\*</sup>

<sup>1</sup>Department of Chemical Engineering, University of Florida, Gainesville, FL 32611, USA

#### S1. $\text{O}_2$ TPD data obtained after the CF to bixbyite transformation

Figure S1 compares  $\text{O}_2$  TPD spectra obtained after 9, 10 and 19 oxidation and reductions steps, with oxidation achieved by exposing the film to ~60 ML of O-atoms at 300 K. Figure S1 also shows an  $\text{O}_2$  TPD spectrum obtained after the 20<sup>th</sup> oxidation step performed at 300 K and using an O-atom exposure of ~120 ML. This comparison reveals that the  $\text{O}_2$  TPD traces after steps 9, 10 and 19 differ only slightly, and that doubling the O-atom exposure at the 20<sup>th</sup> step causes only a small increase (< 0.1 ML) in the  $\text{O}_2$  TPD yield in the  $\alpha$ -feature. The data thus supports the conclusion that the CF to bixbyite transformation effectively reaches completion after the 10<sup>th</sup> oxidation and reduction step.

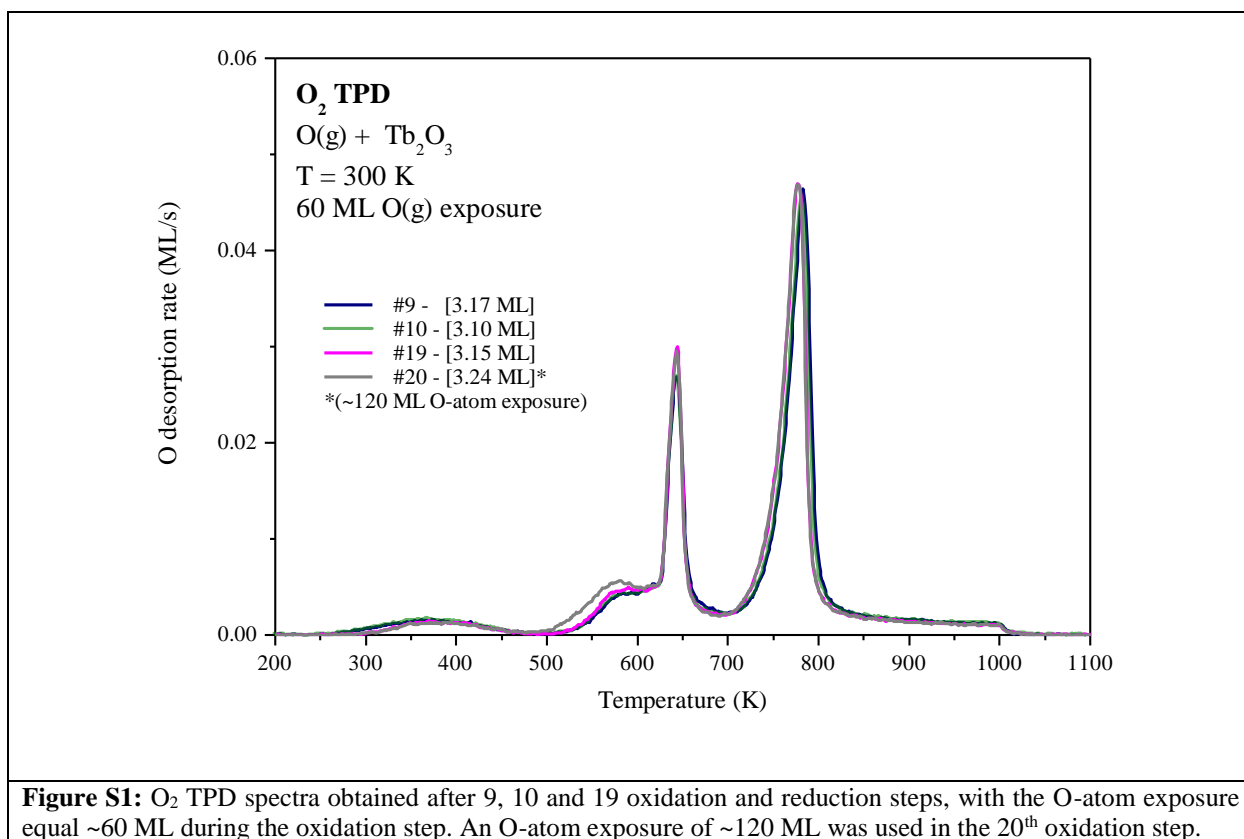

## S2. Estimates of oxide-phase quantities from O<sub>2</sub> TPD fits

We estimated the quantity of oxygen desorbing from the oxidized CF-TbO<sub>x</sub>, δ-Tb<sub>11</sub>O<sub>20</sub> and ι-Tb<sub>7</sub>O<sub>12</sub> phases by fitting the measured O<sub>2</sub> TPD spectra with peaks representing decomposition from each of these phases. Our goal was to obtain reasonable estimates of the O<sub>2</sub> TPD yields for the individual TPD peaks rather than to quantitatively reproduce the TPD peak shapes. For this purpose, we found it convenient to fit the ι and δ TPD peaks using Lorentz functions and the CF TPD peak using a Voigt function. Figure S2a shows measured and fit TPD peaks obtained from a reference ι-phase that we prepared by extensively oxidizing the final c-Tb<sub>2</sub>O<sub>3</sub> film, and then heating to 700 K to desorb oxygen from the α and δ phases. We fit the resulting TPD spectrum using a single Lorentz function and obtain excellent agreement with the measured O<sub>2</sub> TPD yield.

We subsequently fit the O<sub>2</sub> TPD spectrum obtained from the oxidized CF-TbO<sub>x</sub> film prior to heating to 1000 K to initiate the CF to bixbyite transformation. In this case, we fit the main, broad TPD feature arising from CF-TbO<sub>x</sub> decomposition using a Voigt function and fit the small ι-peak (Figure S2b) by adjusting only the intensity of the Lorentz function for the ι-peak while keeping other peak parameters (center, width, etc) fixed at the values determined for the iota reference spectrum (Figure S2a). Similarly, we optimized a Lorentz function to fit the δ-peak observed in a TPD spectrum obtained after extensively oxidizing the final c-Tb<sub>2</sub>O<sub>3</sub> film, and subsequently heating to 600 K to desorb oxygen from the α feature and thereby generating a TPD spectrum exhibiting only the δ and ι peaks (not shown).

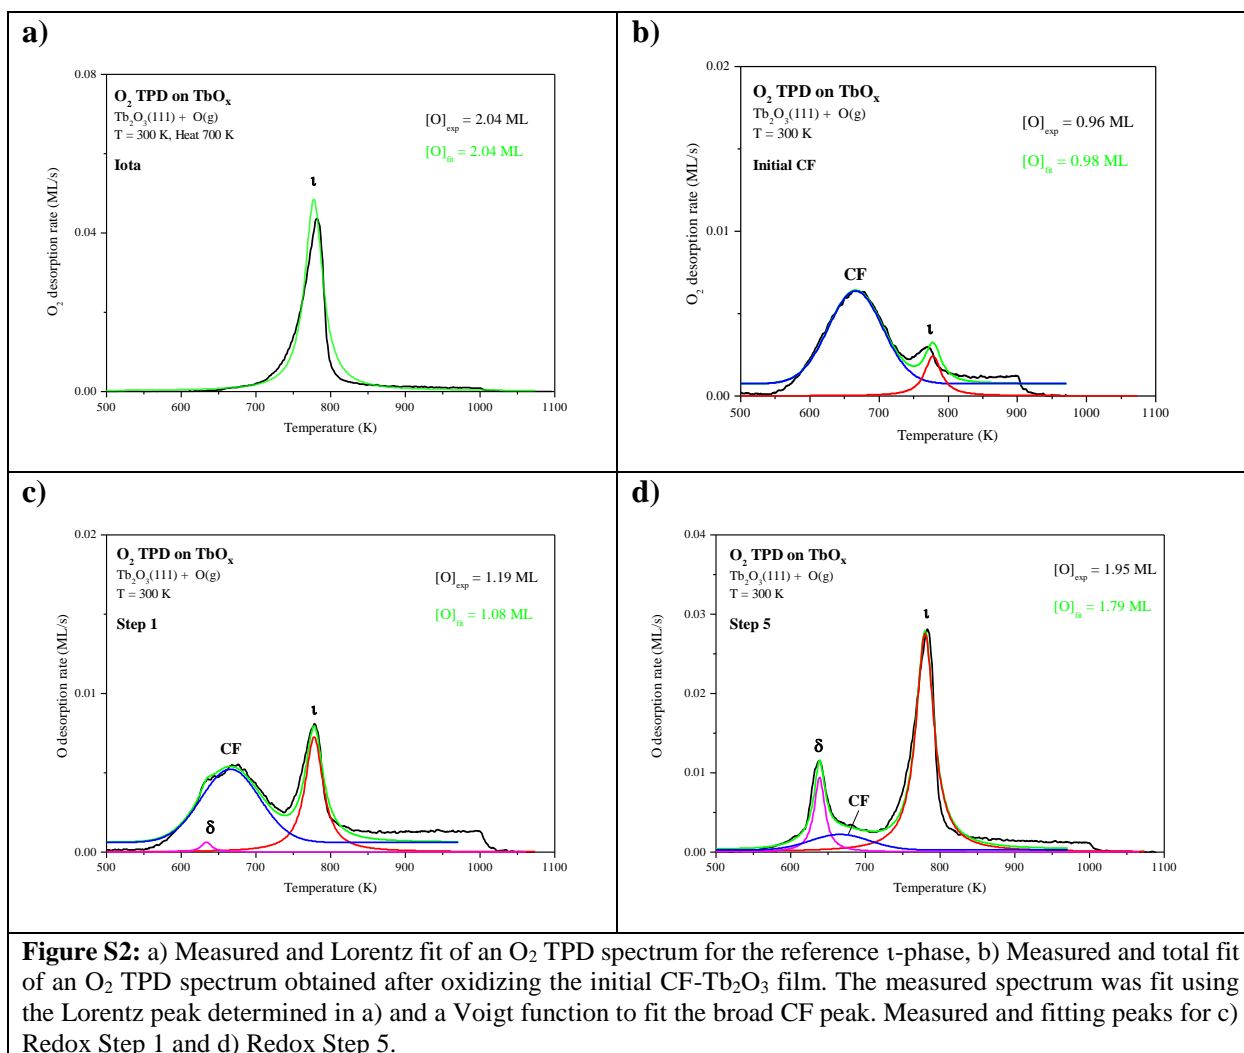

After setting the individual peak parameters as described above, we fit  $O_2$  TPD spectra for each redox step by optimizing the intensities of the CF,  $\delta$  and  $\iota$  peaks. Figures S2c and d compare measured  $O_2$  TPD spectra for Steps 1 and 5 with the individual fit peaks and their sum, i.e., the total fit spectrum. We find that the fit spectra reproduce the measured  $O_2$  TPD yields to within better than about 10%.
